# Supplementary material for: An ultra-stable lithium plating process enabled by the nanoscale interphase of a macromolecular additive
Source: Royal Society of Chemistry journal article supplement (doi:10.1039/d0ta08492a), 2020-01-01
Supplement: d0ta08492a1.pdf [file d0ta08492a1.pdf]

## Support Information

### Ultra Stable Lithium Plating Process Enabled by Nanoscaled Interphase of Macromolecular Additive

Mengmin Jia,<sup>ab</sup> Yawei Guo,<sup>a</sup> Haiyan Bian,<sup>c</sup> Qipeng Zhang,<sup>ab</sup> Lan Zhang\*<sup>ad</sup> and Suojiang Zhang\*<sup>ab</sup>

<sup>a</sup> CAS Key Laboratory of Green Process and Engineering, Beijing Key Laboratory of Ionic Liquids Clean Process, State Key Laboratory of Multiphase Complex Systems, Institute of Process Engineering, Chinese Academy of Sciences, Beijing 100190, PR China.

<sup>b</sup> School of Chemical Engineering, University of Chinese Academy of Sciences, Beijing 100049, PR China.

<sup>c</sup> School of Chemical Engineering and Environment, China University of Petroleum, Beijing 102249, PR China.

<sup>d</sup> Langfang Institute of Process Engineering, Chinese Academy of Sciences, Hebei 065001, PR China.

† Corresponding author Email address: E-mail: [zhangl@ipe.ac.cn](mailto:zhangl@ipe.ac.cn) (Lan Zhang),  
[sjzhang@ipe.ac.cn](mailto:sjzhang@ipe.ac.cn) (Suojiang Zhang)

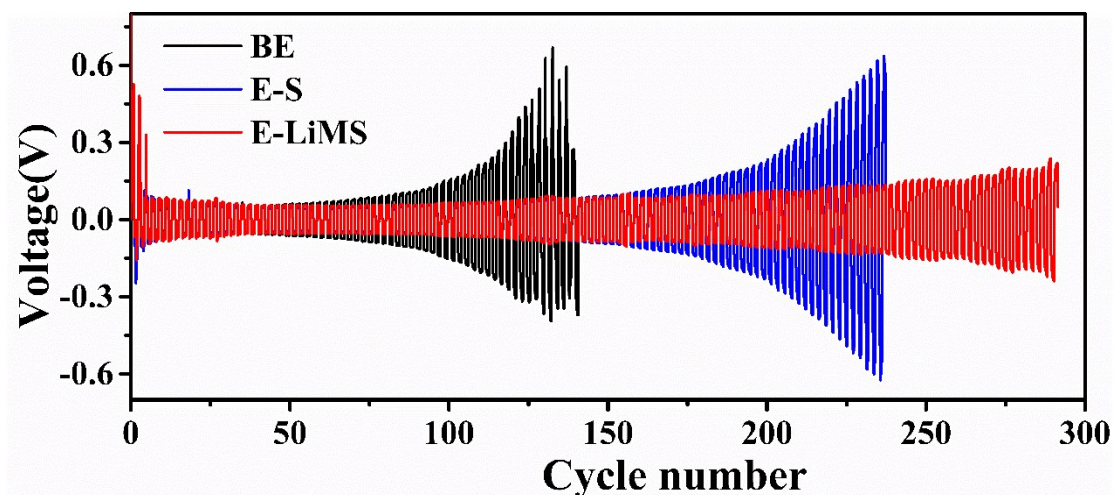

**Fig. S1** Voltage profiles of symmetric cells at the current of  $1.0 \text{ mA/cm}^2$  and the fixed areal capacity  $1 \text{ mAh/cm}^2$  with the electrolytes of BE, E-S and E-LiMS.

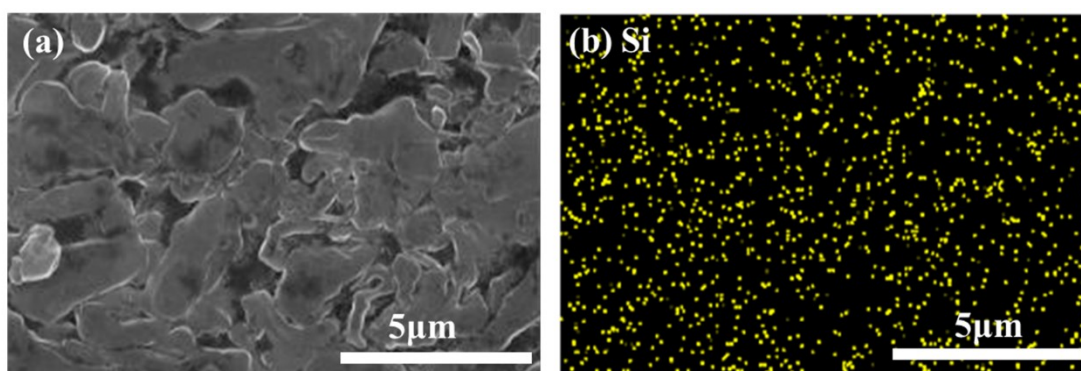

**Fig. S2** Morphologies of lithium anodes after 20 cycles under the areal capacity of  $1 \text{ mAh/cm}^2$  and current density of  $0.5 \text{ mA/cm}^2$ , (a) surface morphology of lithium anode cycled with E-LiMS, and (b) the corresponding EDS mapping of silicon.

The EDS mapping illustrates that LiMS is distributed on the surface of lithium anode homogeneously.

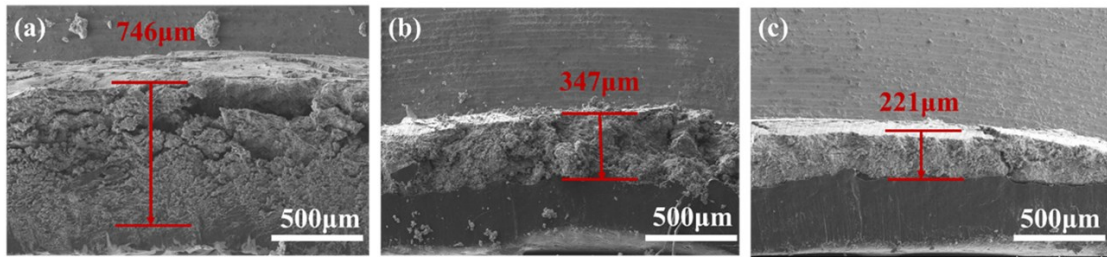

**Fig. S3** SEM cross-section images after Li||Li symmetric batteries cycling 280 h ( $1.0 \text{ mA/cm}^2$ ,  $1 \text{ mAh/cm}^2$ ) with different electrolytes, (a) BE, (b) E-S, (c) E-LiMS.

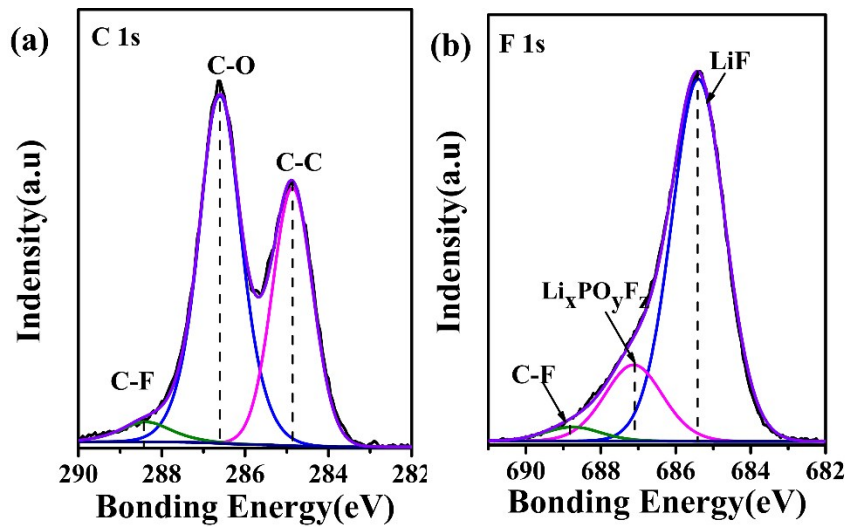

**Fig. S4** XPS results after  $\text{LiPF}_6$  and PEO reacted for 1 h at  $60 \text{ }^\circ\text{C}$ , (a) C 1s, (b) F 1s.

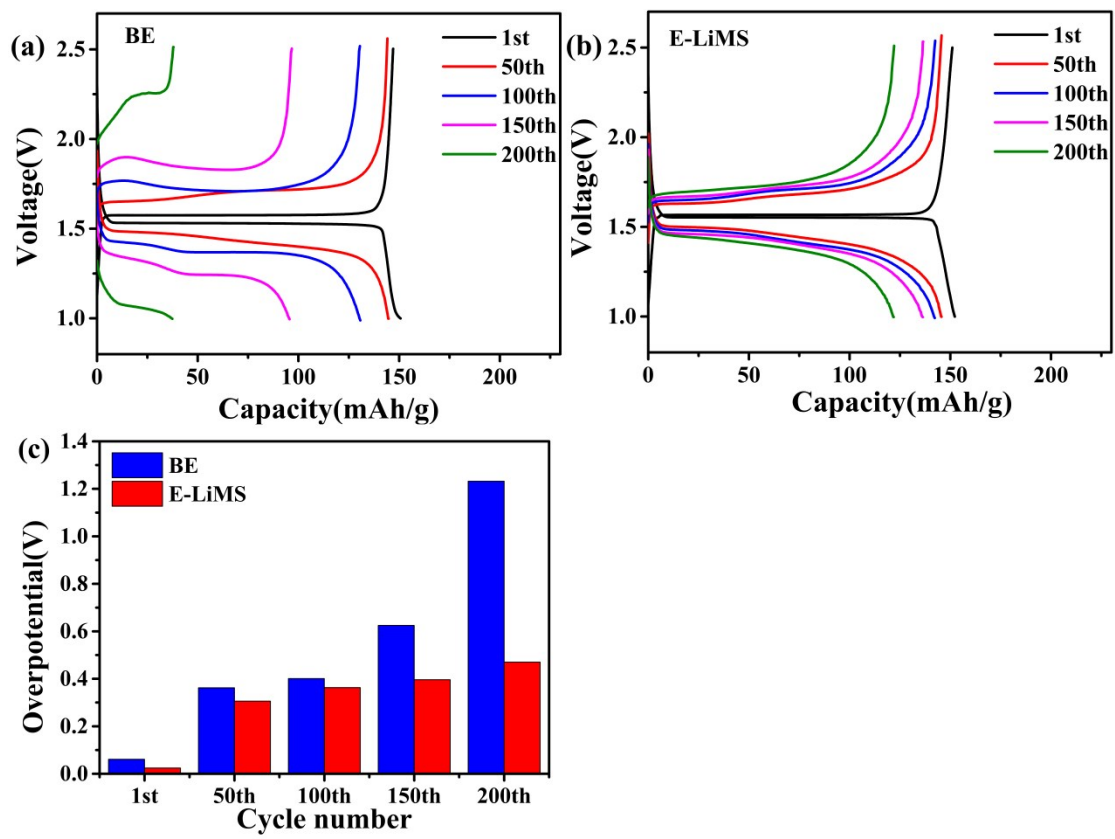

Fig. S5 Charge/discharge profiles of Li||LTO cells with different electrolytes under 60 °C at 5 C (a)

BE, (b) E-LiMS, (c) potential hysteresis of batteries with different electrolytes at selected cycles.

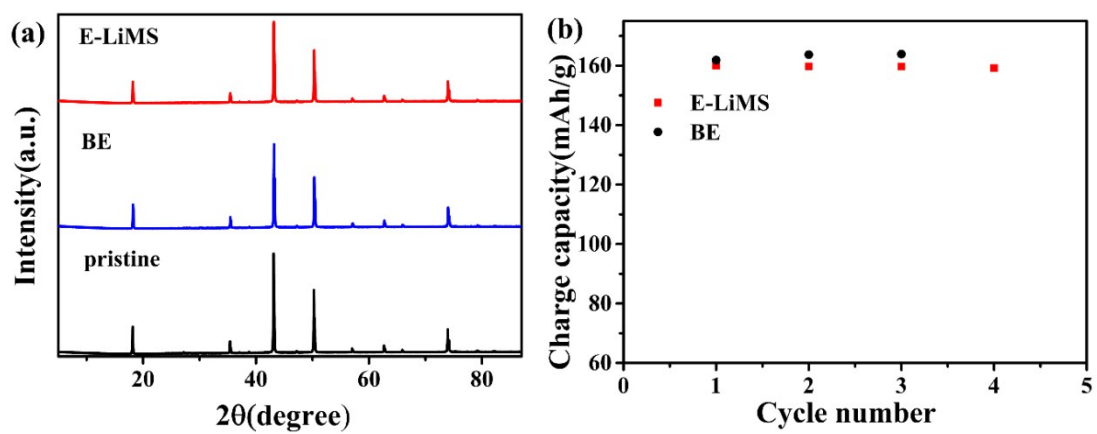

**Fig. S6** Characterization of LTO electrode after cycling 200 cycles under 60 °C at 5 C, (a) XRD, (b) cycling performance of reassembled batteries with the cycled LTO electrode and fresh lithium metal anode, 0.2 C.

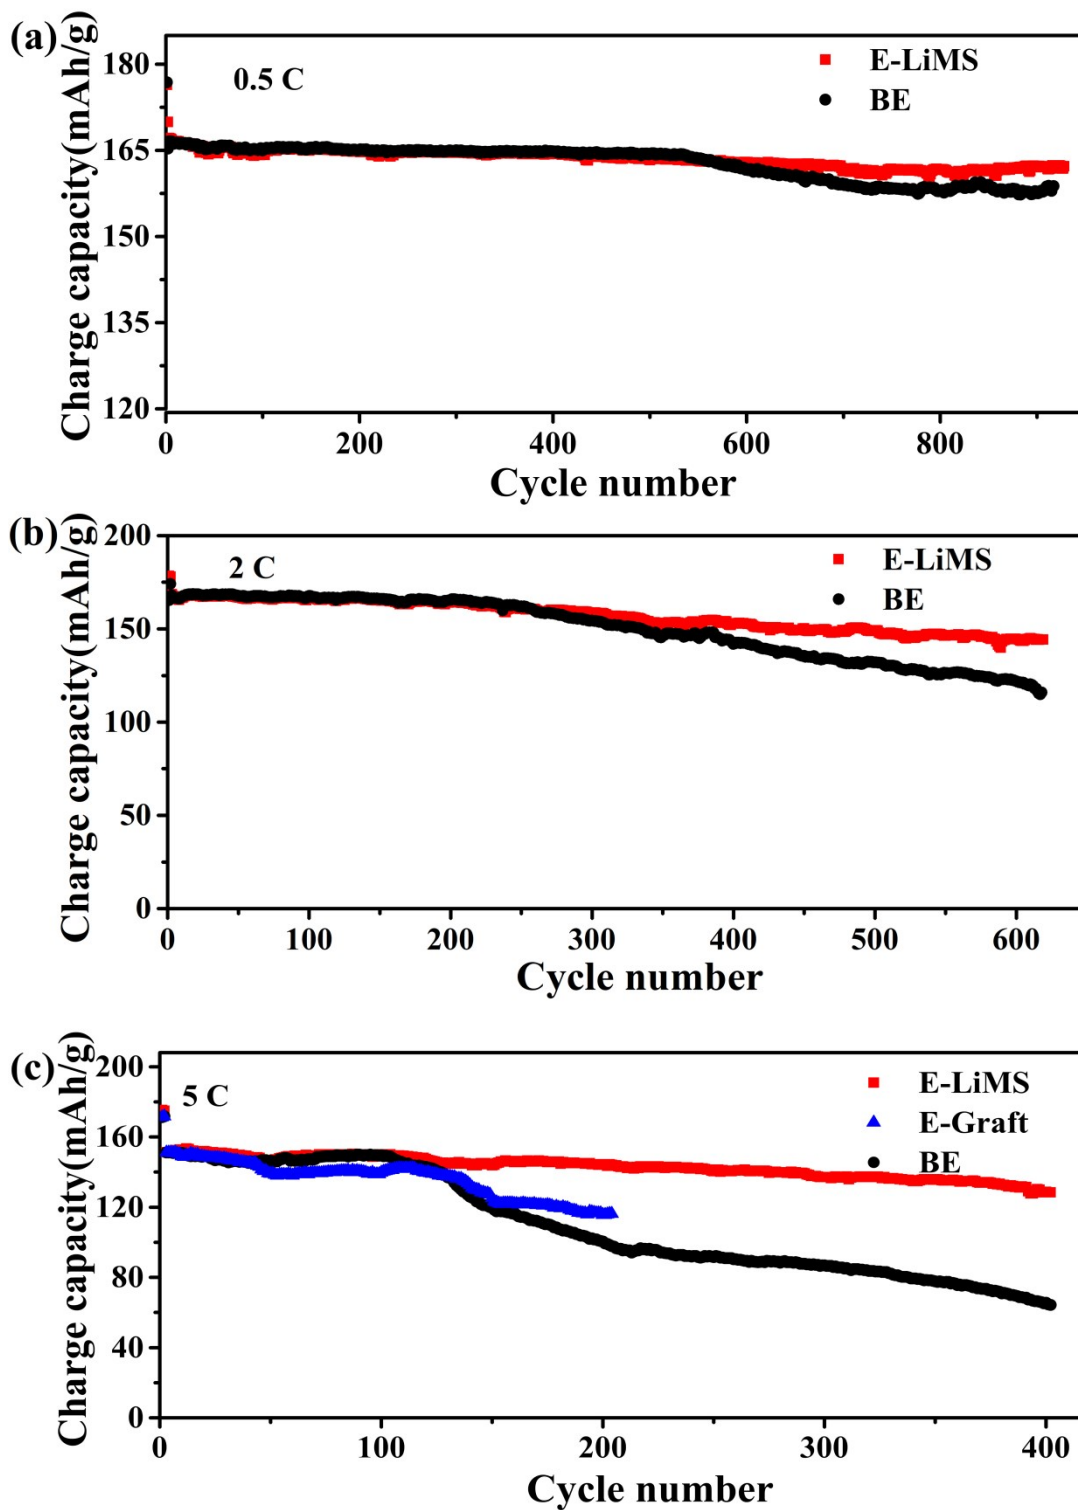

Fig. S7 Long-term stability performance of Li||LTO batteries with different electrolytes under room temperature, (a) 0.5 C, (b) 2 C, (c) 5 C.



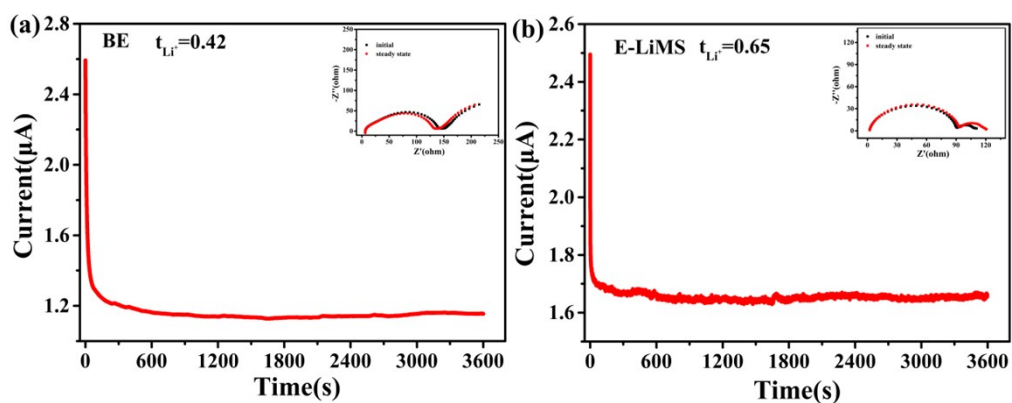

**Fig. S8** The transfer number of  $\text{Li}^+$  with different electrolytes, (a) BE, (b) E-LiMS.

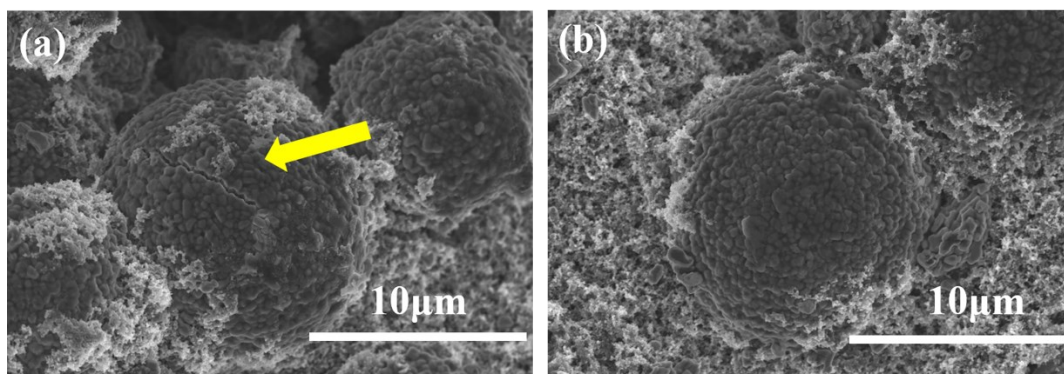

**Fig. S9** SEM images of NCM811 electrode after 105 cycles between 3~4.5V, 2 C rate using different electrolytes, (a) BE, (b) E-LiMS.

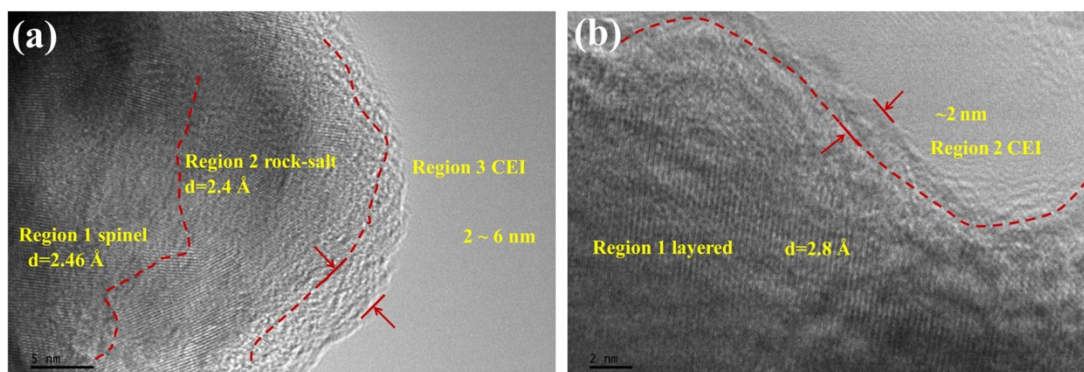

**Fig. S10** TEM images of NCM811 electrode after 105 cycles between 3~4.5V, 2 C rate using different electrolytes, (a) BE, scale bars 5 nm, (b) E-LiMS, scale bars 2 nm.
